# Supplementary material for: 13C CP MAS NMR and DFT Studies of 6-Chromanyl Ethereal Derivatives
Source: MDPI journal article supplement (doi:10.3390/molecules27144630), 2022-07-20
Supplement: s1 [file s1]

## Electronic supplementary information

for

$^{13}\text{C}$  CP MAS NMR and DFT studies of 6-chroman-2-yl ether derivatives.†

Piotr Wałęjko<sup>1\*</sup>, Łukasz Szeleszczuk<sup>2\*</sup>, Dariusz Maciej Pisklak<sup>2</sup>, and Sławomir Wojtulewski<sup>1</sup>

<sup>1</sup>University of Białystok, Faculty of Chemistry, Ciołkowskiego 1K, 15-245 Białystok, Poland

<sup>2</sup> Department of Physical Chemistry, Chair of Physical Pharmacy and Bioanalysis, Faculty of Pharmacy, Medical University of Warsaw, Banacha 1 Str., 02-093 Warsaw, Poland

\* Correspondence: lukasz.szeleszczuk@wum.edu.pl; Tel.: +48-501-255-121 (Ł.Sz.) ; tel: +48 85 7388086; pwalejko@uwb.edu.pl (P.W.)

† Dedicated to Prof. Stanisław Witkowski on the occasion of his 70th birthday.

### Table of contents

#### Experimental section

##### 1. Synthesis and spectroscopic data of ethers 3-5

**Fig. S1.** Crystal packing scheme in **3**. A view of the unit cell in the [010] direction. Hydrogen atoms are omitted for clarity.

**Fig. S2.** The dimeric structure formed in crystals of **4** a) and supramolecular structure formed by methyl ether **4** (view of the unit cell in the [010] direction).

**Fig. S3.** Crystal packing scheme in **5** with torsion angle  $\theta$  [°] (red) and  $\gamma$  [°] (blue) values. A view of the unit cell in the [010] direction. Hydrogen atoms are omitted for clarity.

**Fig. S4.** The short contact in crystal structure of **5**.

**Fig. S5** Dynamic  $^{13}\text{C}$  NMR spectra of **4**: a) 298.3, b) 239.6, c) 210.2, d) 178.4 K.

**Fig. S6** Dynamic  $^{13}\text{C}$  NMR spectra of **5** (ether TBDMS): a) 298, b) 250, c) 200 and d) 190 K.

**Fig. S7** Dynamic  $^{13}\text{C}$  NMR of **3** in differentia temperature of measurement (temp. range 290 – 165 K).

**Fig. S8** Conformations of **3**: a (green), TS (red), h (blue).

**Table S1.** The bonds length comparison in ethers **4**, **3A-B** and **5A-B** and differences in bond lengthens between **4** and ethers **3** and **5** with  $3\sigma$  values).

**Table S2.** The bonds length comparison between 4-methoxy-2,3,5,6-tetramethylphenol (4MTP, CCDC MOPHLA) and ethers **4**, **3A-B** and **5A-B**.

**Tabela S3.** Data for ether **3** from WinNMR.

Table S4. Energies [kJ/mol], relative energies [kJ/mol] and calculated NMR isotropic chemical shift values [ppm] of the studied conformations of **3**.

## 1. Synthesis and spectroscopic data of ethers **3-5**

2,2,5,7,8-pentamethyl-6-((tetrahydro-2H-pyran-2-yl)oxy)chromane (**3**).

The chroman-6-ol (**2**; 1 equiv.) was stirred overnight at room temperature with 3,4-dihydro-2H-pyran (3 equiv.) in diethyl ether solutions containing catalytic amount of PTSA. In next step the reaction mixture was incubated with excess of solid  $\text{K}_2\text{CO}_3$  and after aqueous work-up the resulted organic fraction was concentrated in vacuum to dryness. The crude ether **3** was purified by MPLC (hexane-ethyl acetate. 15:1 v/v)). Re-crystallization from ethanol gave the desired product **3** with 60% yield.

$^1\text{H}$  NMR ( $\delta$ , 400 MHz,  $\text{CDCl}_3$ ): 4.67 (dd, 1H, H-1',  $^3J_{\text{H-H}} = 6.9$  Hz and 2.2 Hz), 4.09 (m, 1H, H-5'ax), 3.48 (m, 1H, H-5'eq), 2.62 (m, 2H, H-4), 2.21 (s, 3H, H-7a), 2.18 (s, 3H, H8b), 2.11 (s, 3H, H-5a), 1.95 (m, 2H, H-2'ax and 3'ax), 1.87 (m, 1H, H-2'eq), 1.81 (~t, 2H, H-3,  $^3J_{\text{H-H}} = 7.1$  Hz), 1.599 (m, 2H, H-4' and 3'eq), 1.315 (s, 6H, H-2a and 2b) ppm.

$^{13}\text{C}$  NMR ( $\delta$ , 150 MHz,  $\text{CDCl}_3$ ): 148.00 (C8a), 147.33 (C6), 128.25 (C7), 126.38 (C5), 122.57 (C8), 117.04 (C4a), 103.73 (C1'), 72.64 (C2), 65.06 (C5'), 32.94 (C3), 31.29 (C2'), 26.86 (C2a), 26.80 (C2b), 25.24 (C4'), 21.16 (C3'), 21.06 (C4), 13.81 (C7a), 12.93 (C5a), 11.86 (C8b) ppm.

IR ( $\text{CHCl}_3$ )  $\nu_{\text{max}}/\text{cm}^{-1}$ : 3003, 2977, 2945, 2855, 1456, 1412, 1382, 1370, 1264, 1167, 1125, 1102, 1077, 1035, 952, 926, 909, 897.

TOF MS ES<sup>+</sup>: 327 [M + Na]<sup>+</sup>; HRMS: m/z: calc. for C<sub>19</sub>H<sub>28</sub>O<sub>3</sub>Na [M + Na]<sup>+</sup>: 327.1931; found: 327.1938

#### 6-methoxy-2.2.5.7.8-pentamethylchromane (4)

The chroman-2-ol (**2**, 1 equiv.) and dimethyl sulfate (excess) were heating with stirring in dry suspension of K<sub>2</sub>CO<sub>3</sub> in acetone. The cooled solution was poured into water and extracted with diethyl ether (3 × 50 mL). The combined organic extracts were washed with sodium bicarbonate, dried over anhydrous Na<sub>2</sub>SO<sub>4</sub> and concentrated under reduced pressure. The residue was purified by flash column chromatography (hexane/ethyl acetate, 20:1, *v/v*) to afford ester **4** as a white solid with 70% yield.

The <sup>1</sup>H and <sup>13</sup>C NMR spectra were with good similarity to those described in literature. [Byzova. V. N.; Zakharova. E. I.; Zhukova. E. E.; Sarycheva. I. K.; Evstigneeva. R. P.; Journal of Organic Chemistry USSR (English Translation); vol. 24; nb. 11; (1988); p. 2135 - 2140; Zhurnal Organicheskoi Khimii; vol. 24; nb. 11; (1988); p. 2368 - 2374. and Al-Khayat. Isam; Dean. Francis M.; France. Steven N.; Matkin. David A.; Orabi. Mohamed O. A.; et al.; Journal of the Chemical Society. Perkin Transactions 1: Organic and Bio-Organic Chemistry (1972-1999); (1985); p. 1301 – 1310] <sup>1</sup>H NMR (δ, 400 MHz, CDCl<sub>3</sub>): 3.64 (s, 1H, H-1'), 2.63 (t, 2H, H-4, <sup>3</sup>J<sub>H-H</sub> = 6.8 Hz), 2.20 (s, 3H, H-7a), 2.16 (s, 3H, H8b), 2.10 (s, 3H, H-5a), 1.82 (t, 2H, H-3, <sup>3</sup>J<sub>H-H</sub> = 6.8 Hz), 1.33 (s, 6H H-2a and 2b) ppm.

<sup>13</sup>C NMR (δ, 150 MHz, CDCl<sub>3</sub>): 147.88 (C8a), 149.45 (C6), 127.72 (C7), 125.70 (C5), 122.85 (C8), 117.31 (C4a), 72.71 (C2), 60.35 (C1'), 32.91 (C3), 26.8179 (C2a and 2b), 20.94 (C4), 12.52 (C7a), 11.74 (C8b), 11.66 (C5a) ppm.

TOF MS ES<sup>+</sup>: 257 [M + Na]<sup>+</sup>; HRMS: m/z: calc. for C<sub>15</sub>H<sub>22</sub>O<sub>2</sub>Na [M + Na]<sup>+</sup>: 257.1512; found: 257.1519

#### *tert*-butyl-*di*-methyl((2.2.5.7.8-pentamethylchroman-6-yl)oxy)silane (5)

Trimethylamine (1.5 equiv.) under argon atmosphere was added to the chroman-2-ol (**2**, 1 equiv.) in dry THF solution and after 5 min. of stirring the *tert*-butyldimethylsilyl chloride (TBDMSCl, 1.1 equiv.) was added dropwise. The reaction after overnight stirring at room temperature was poured into water and extracted with diethyl ether (3 × 50 mL). The combined organic extracts were washed with sodium bicarbonate, dried over anhydrous Na<sub>2</sub>SO<sub>4</sub> and concentrated under reduced pressure. The residue was purified by flash column chromatography (hexane/ethyl acetate, 30:1. v/v) to afford ester **5** with 80% yield.

<sup>1</sup>H NMR (δ, 400 MHz, CDCl<sub>3</sub>): 2.58 (t, 2H, H-4, <sup>3</sup>J<sub>H-H</sub> = 6.8 Hz), 2.11 (s, 3H, H-7a), 2.09 (s, 6H, H-8b), 2.07 (s, 3H, H-5a), 1.80 (t, 2H, H-3, <sup>3</sup>J<sub>H-H</sub> = 6.8 Hz), 1.30 (s, 6H, H-2a and 2b), 1.06 (s, 9H, H-2'), 0.13 (s, 6H, H-1') ppm.

<sup>13</sup>C NMR (δ, 150 MHz, CDCl<sub>3</sub>): 146.05 (C8a), 144.14 (C6), 125.84 (C7), 123.50 (C5), 122.63 (C8), 117.25 (C4a), 72.45 (C2), 33.10 (C3), 26.77 (C2a and 2b) 26.12 (C2''), 21.21 (C4), 18.61 (C2'), 14.33 (C7a), 13.41 (C5a), 11.93 (C8b), -3.21 (C1') ppm.

TOF MS ES<sup>+</sup>: 357 [M + Na]<sup>+</sup>; HRMS: m/z: calc. for C<sub>20</sub>H<sub>34</sub>NaO<sub>2</sub>Si [M + Na]<sup>+</sup>: 357.2220; found: 357.2226

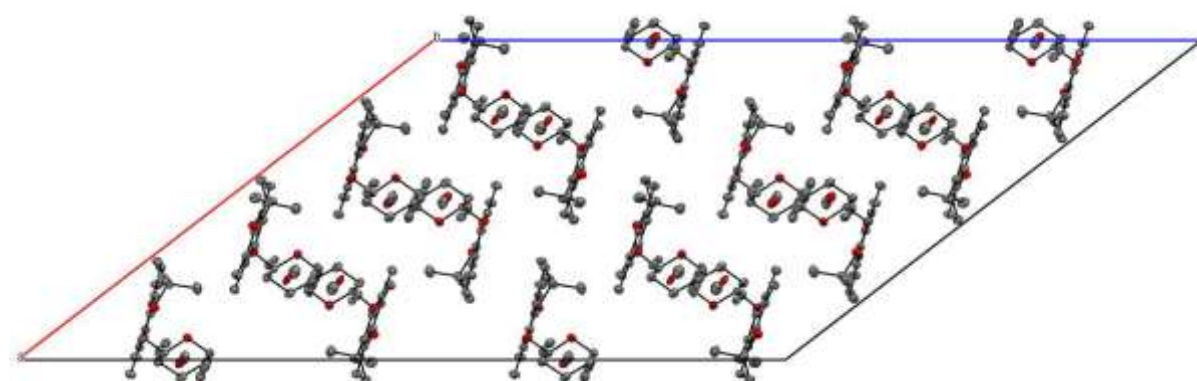

**Fig. S1.** Crystal packing scheme in **3**. A view of the unit cell in the [010] direction. Hydrogen atoms are omitted for clarity.

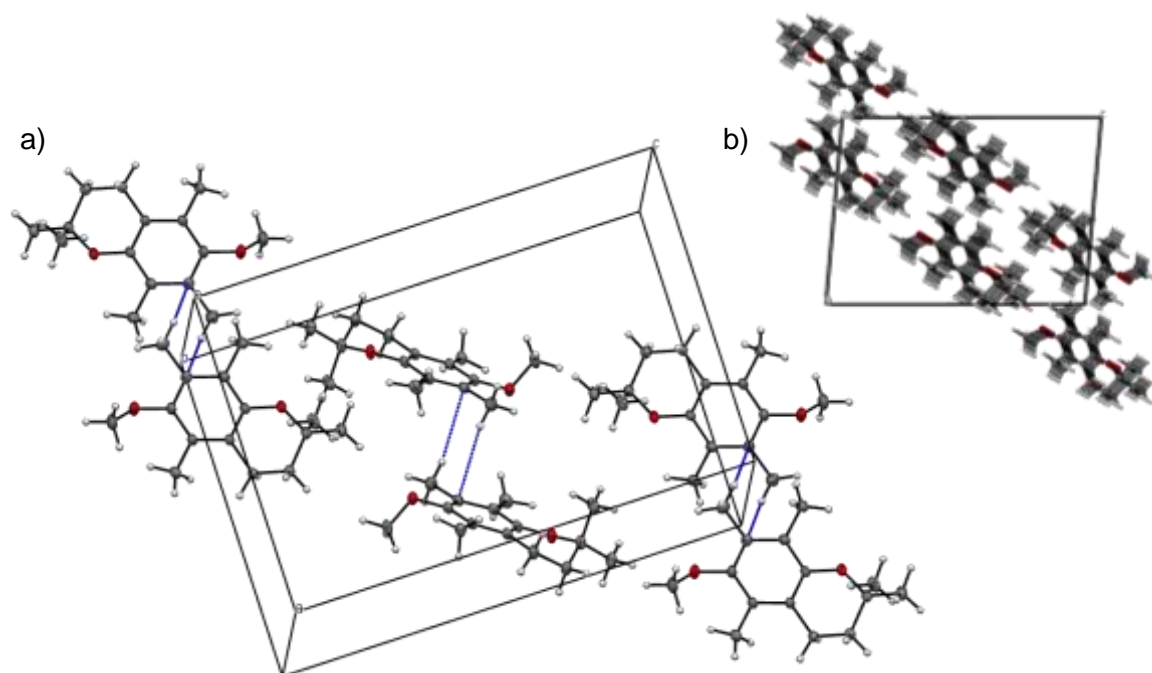

**Fig. S2.** The dimeric structure formed in crystals of **4** a) and supramolecular structure formed by methyl ether **4** (view of the unit cell in the [010] direction).

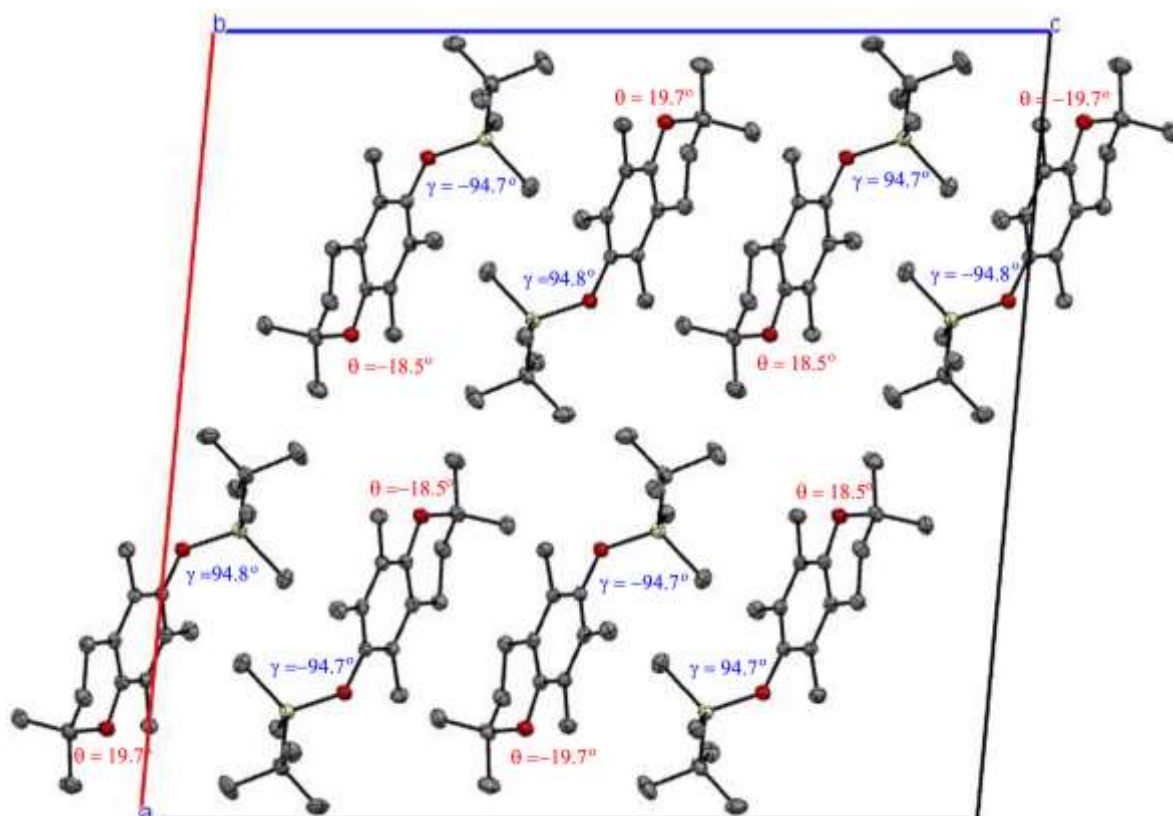

**Fig. S3.** Crystal packing scheme in **5** with torsion angle  $\theta$  [°] (red) and  $\gamma$  [°] (blue) values. A view of the unit cell in the [010] direction. Hydrogen atoms are omitted for clarity.

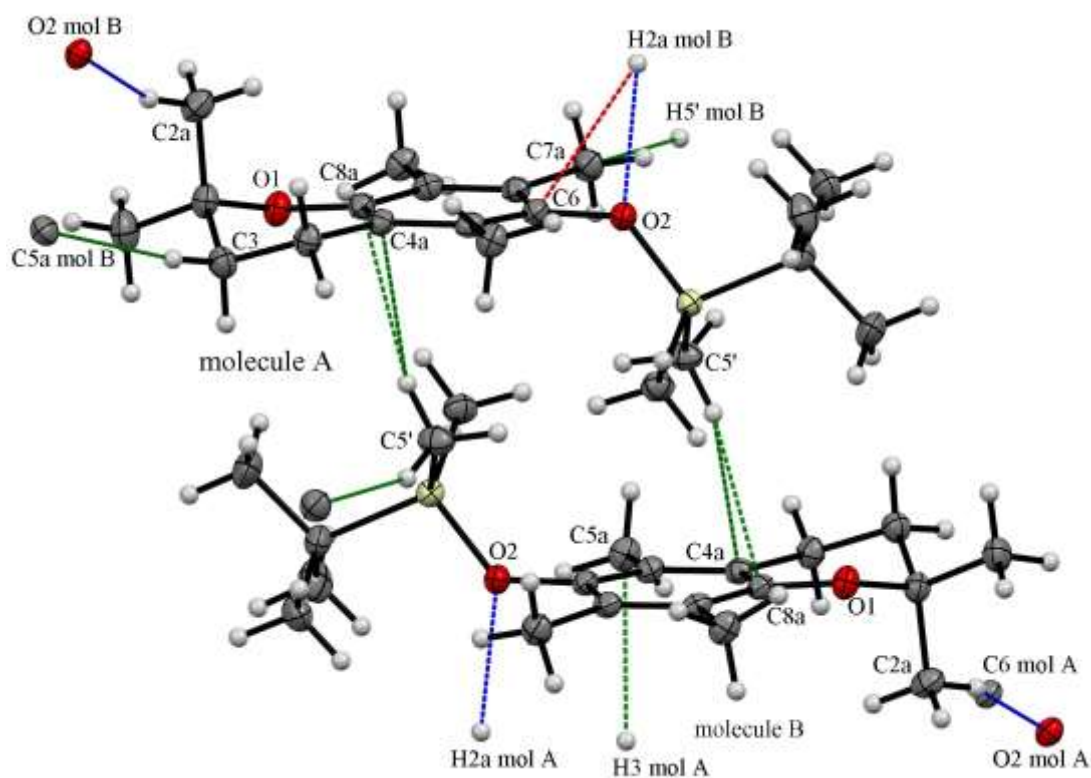

**Fig. S4.** The short contact in crystal structure of **5**.

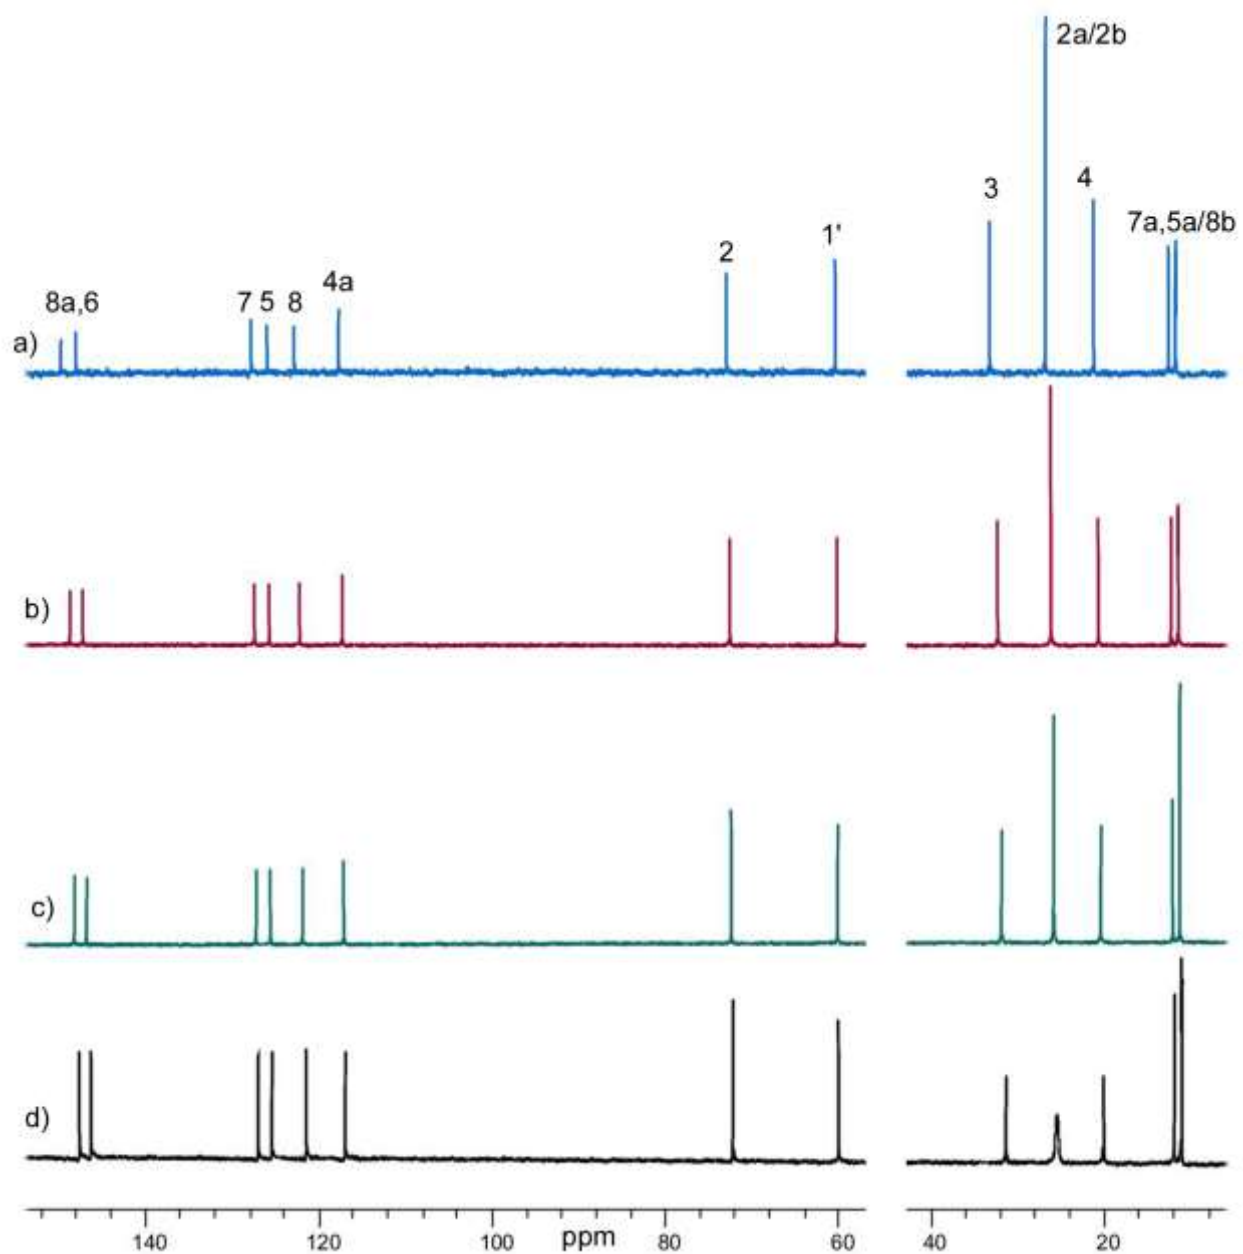

**Fig. S5** Dynamic  $^{13}\text{C}$  NMR spectra of **4**: a) 298.3, b) 239.6, c) 210.2, d) 178.4 K.

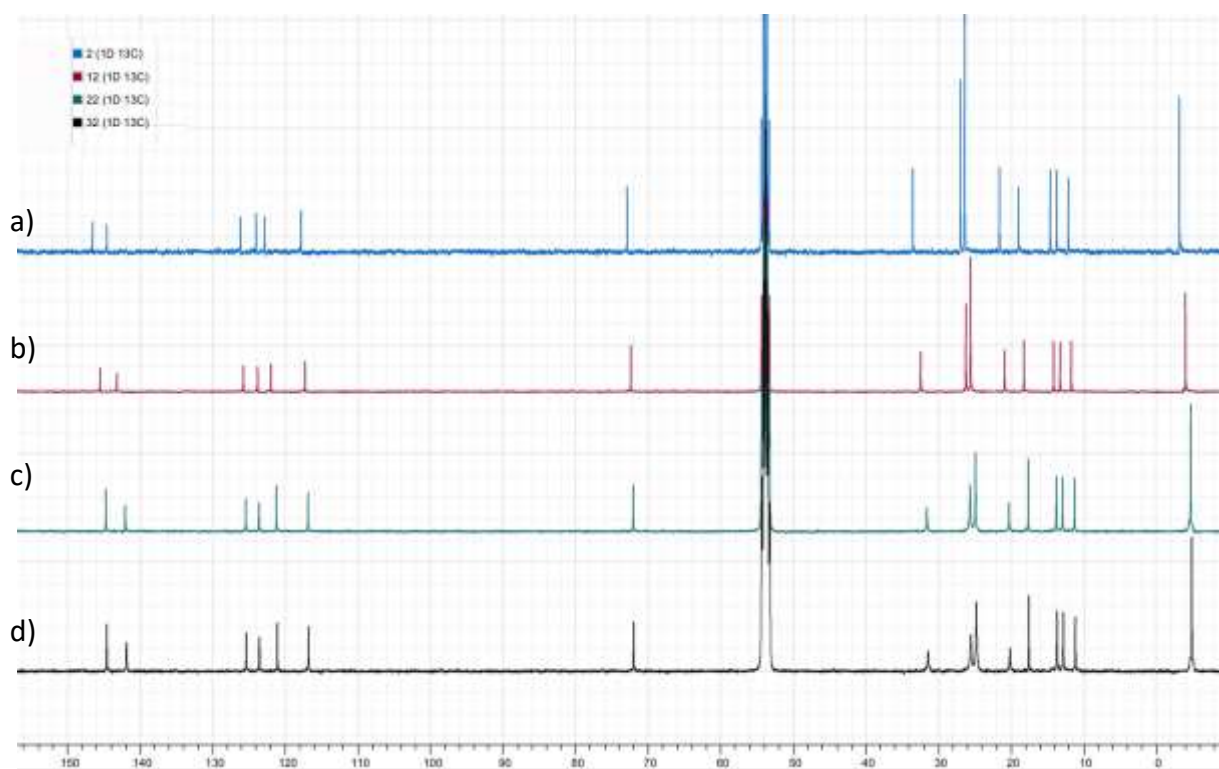

**Fig. S6** Dynamic  $^{13}\text{C}$  NMR spectra of **5** (eter TBDMS): **a)** 298, **b)** 250, **c)** 200 and **d)** 190 K.



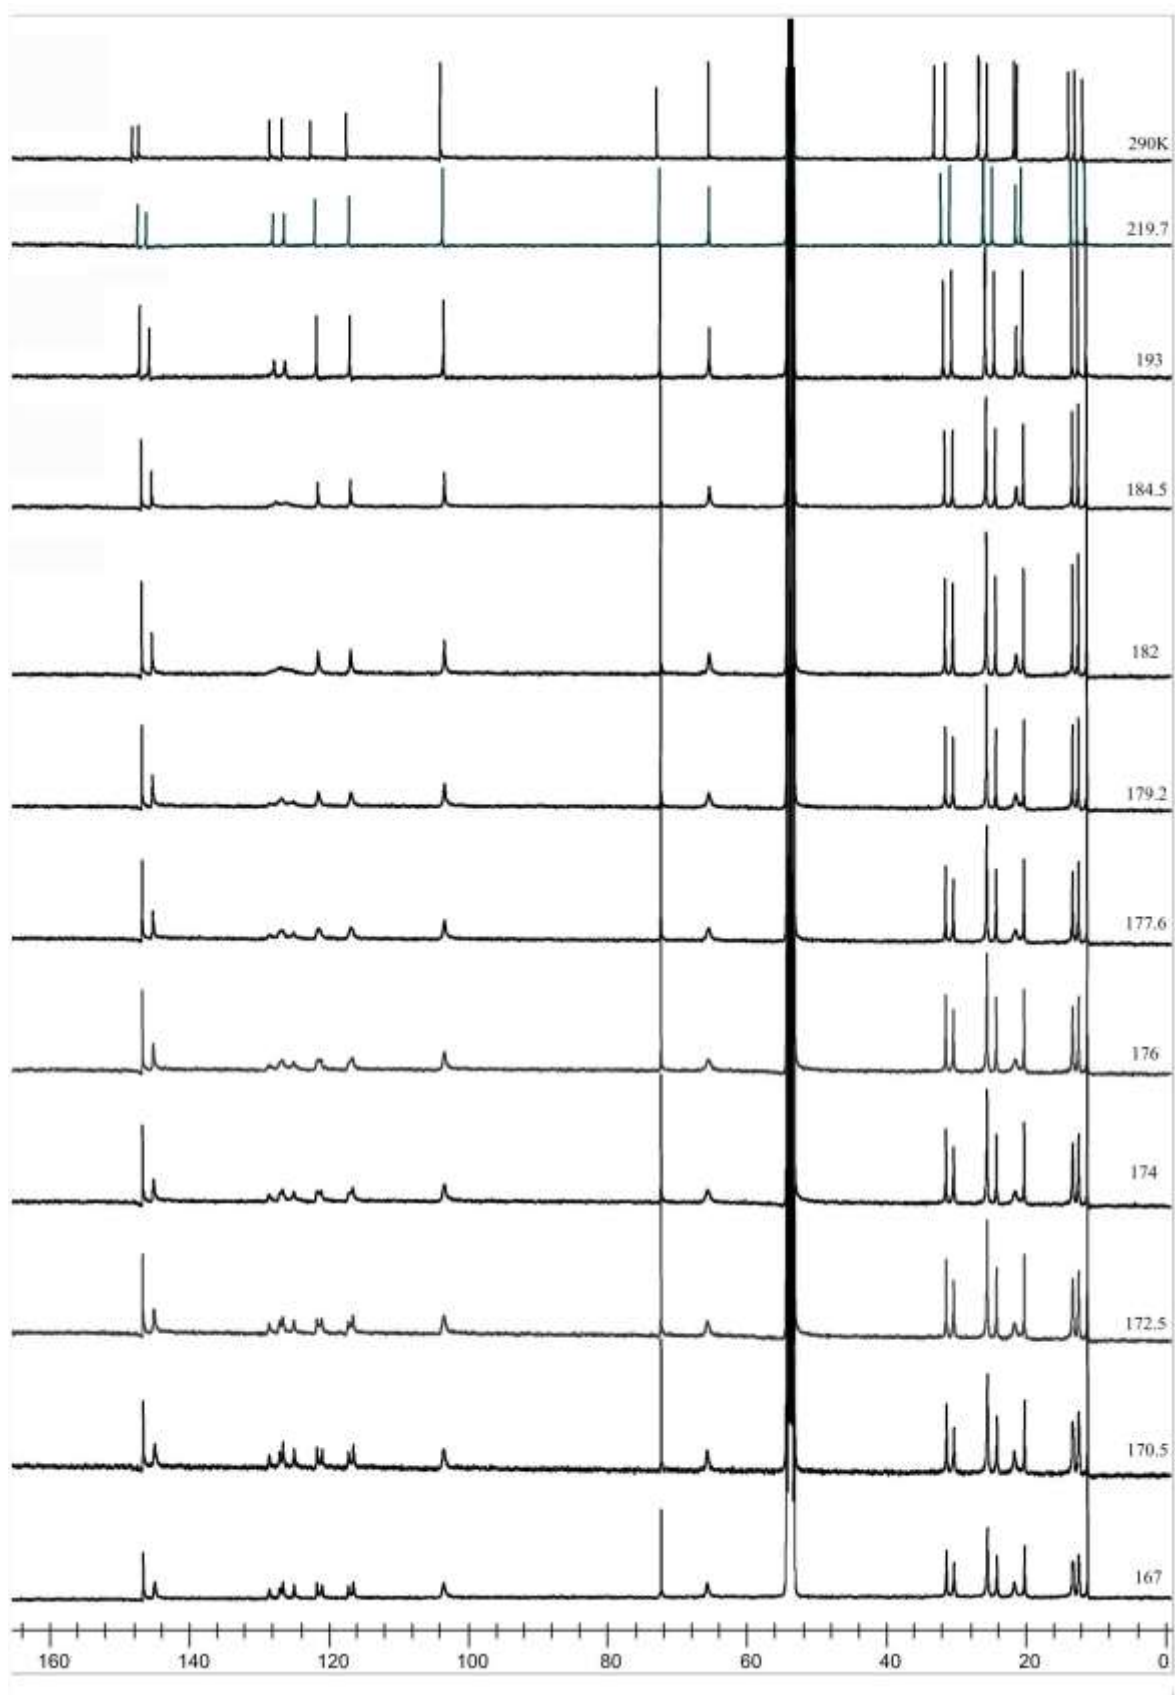

**Fig. S7** Dynamic  $^{13}\text{C}$  NMR of **3** in differentia temperature of measurement (temp. range 290 – 165 K).

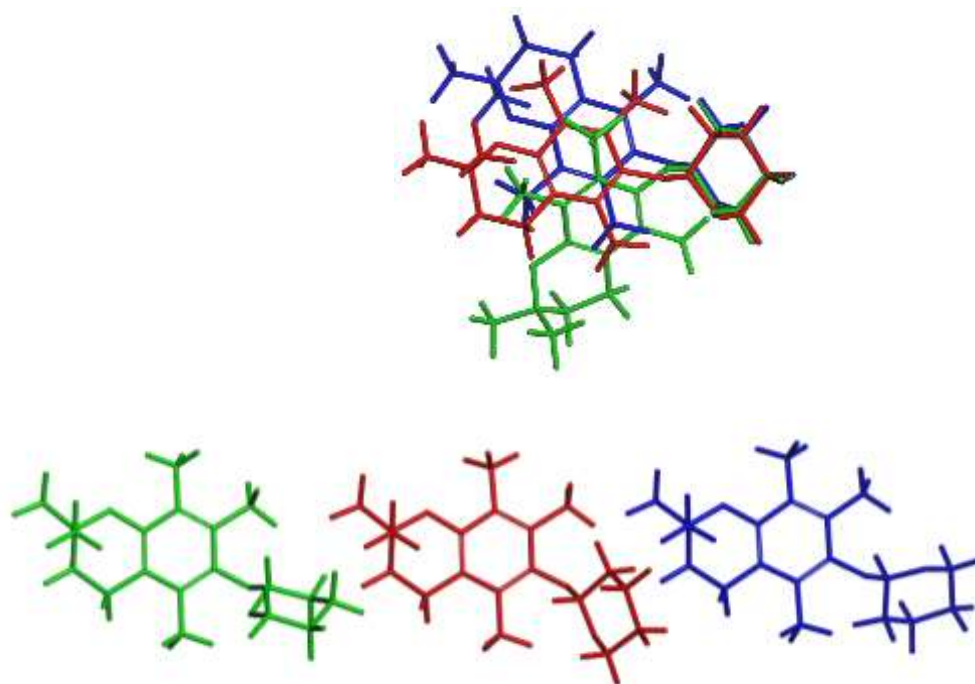

**Fig. S8** Conformations of **3**: a (green), TS (red), h (blue).

**Table S1.** Selected bond lengths [ $\text{\AA}$ ] in ethers **3**, **4** and **5** determined by XRD data.

| Bond lengths |        | 3A       | 3B       | 4        | 5A       | 5B       |
|--------------|--------|----------|----------|----------|----------|----------|
| 8a           | 4a     | 1.397(2) | 1.397(2) | 1.399(2) | 1.396(2) | 1.395(2) |
| 4a           | 5      | 1.404(2) | 1.406(2) | 1.406(2) | 1.408(2) | 1.407(2) |
| 5            | 6      | 1.390(3) | 1.391(3) | 1.393(2) | 1.395(2) | 1.395(2) |
| 6            | 7      | 1.401(2) | 1.401(2) | 1.397(2) | 1.404(2) | 1.404(2) |
| 7            | 8      | 1.399(2) | 1.400(2) | 1.401(2) | 1.402(2) | 1.405(2) |
| 8            | 8a     | 1.404(3) | 1.403(3) | 1.402(2) | 1.397(2) | 1.397(2) |
| 8            | 8b     | 1.508(2) | 1.510(3) | 1.508(2) | 1.514(2) | 1.511(2) |
| 5            | 5a     | 1.508(2) | 1.508(2) | 1.508(2) | 1.510(2) | 1.510(2) |
| 7            | 7a     | 1.507(3) | 1.508(3) | 1.508(2) | 1.508(2) | 1.506(2) |
| O2           | 6      | 1.403(2) | 1.405(2) | 1.399(2) | 1.390(1) | 1.391(1) |
| O1           | 2      | 1.451(3) | 1.453(3) | 1.453(2) | 1.450(2) | 1.453(2) |
| O1           | 8a     | 1.380(2) | 1.379(2) | 1.383(2) | 1.381(1) | 1.382(1) |
| O2           | 2b     | 1.517(2) | 1.521(4) | 1.523(2) | 1.521(2) | 1.525(2) |
| O2           | 2a     | 1.525(4) | 1.522(2) | 1.519(2) | 1.517(2) | 1.517(2) |
| O2           | C1'/Si | 1.427(7) | 1.418(3) | 1.426(2) | 1.666(1) | 1.667(1) |

**Table S2.** Selected bond angles [°] in ethers **3**, **4** and **5** determined by XRD data.

| Bond angle |    |    | 3A       | 3B       | 4        | 5A       | 5B       |
|------------|----|----|----------|----------|----------|----------|----------|
| 4a         | 5  | 6  | 118.5(2) | 118.9(2) | 118.8(1) | 119.1(1) | 119.2(1) |
| 5          | 6  | 7  | 122.5(2) | 122.3(2) | 122.4(1) | 121.6(1) | 121.8(1) |
| 6          | 7  | 8  | 118.9(2) | 118.8(2) | 118.9(1) | 118.9(1) | 118.7(1) |
| 7          | 8  | 8a | 118.6(2) | 119.0(2) | 118.9(1) | 119.2(1) | 119.2(1) |
| 8          | 8a | 4a | 122.0(2) | 121.8(2) | 121.9(1) | 121.8(1) | 121.9(1) |
| 8a         | 4a | 5  | 119.0(2) | 119.1(2) | 119.0(1) | 119.0(1) | 118.9(1) |
| 6          | 5  | 5a | 121.2(2) | 121.4(2) | 120.9(1) | 120.9(1) | 120.9(1) |
| 6          | 7  | 7a | 120.3(2) | 120.7(2) | 120.8(1) | 120.8(1) | 120.9(1) |
| 7          | 8  | 8b | 121.5(2) | 121.5(2) | 120.7(1) | 121.6(1) | 121.6(1) |
| 8          | 7  | 7a | 120.8(2) | 120.5(2) | 120.2(1) | 120.3(1) | 120.5(1) |
| 8b         | 8  | 8a | 119.9(2) | 119.5(2) | 120.4(1) | 119.1(1) | 119.2(1) |
| O2         | 6  | 7  | 118.6(2) | 119.2(2) | 119.0(1) | 119.1(1) | 118.8(1) |
| O2         | 6  | 5  | 118.8(2) | 118.3(2) | 118.6(1) | 119.2(1) | 119.3(1) |

**Table S3.** Selected torsion angles [°] in ethers **3**, **4** and **5** determined by XRD data.

| Torsion angle |    |    |    | 4      | 3A     | 3B    | 5A     | 5B     |
|---------------|----|----|----|--------|--------|-------|--------|--------|
| 4a            | 8a | O1 | 2  | -21.3  | 16.9   | 14.2  | 19.7   | -18.5  |
| 8b            | 8  | 7  | 7a | 2.5    | 0.6    | -3.5  | 2.3    | -2.7   |
| 8             | 8a | 4a | 5  | -1.0   | 6.5    | 2.7   | -3.7   | 3.4    |
| 8a            | 4a | 5  | 6  | 2.6    | -1.9   | -1.5  | -0.8   | 1.1    |
| 4a            | 5  | 6  | 7  | -2.3   | -3.9   | -1.7  | 5.4    | -5.7   |
| 5             | 6  | 7  | 8  | 0.1    | 5.1    | 3.5   | -5.5   | 5.8    |
| 6             | 7  | 8  | 8a | 1.6    | -0.5   | -2.3  | 1.0    | -1.2   |
| 5             | 6  | 7  | 7a | 179.2  | -175.4 | 174.8 | 172.7  | -172.5 |
| 5a            | 5  | 6  | 7  | 177.5  | 175.6  | 175.8 | -174.2 | 174.4  |
| 8b            | 8  | 8a | 4a | 178.8  | 174.2  | 178.8 | -176   | 176.4  |
| 8a            | 4a | 5  | 5a | -177.1 | 178.7  | -179  | 178.8  | -179   |
| O2            | 6  | 7  | 7a | -2.2   | 0.9    | -0.4  | -3.5   | 3.4    |
| O2            | 6  | 5  | 5a | -1.1   | -0.7   | 1.3   | 2.0    | -1.5   |

**Table S4.** The bonds length comparison in ethers **4**, **3A-B** and **5A-B** and differences in bond lengthens between **4** and ethers **3** and **5** with  $3\sigma$  values).

| Bond      |           | 4               | 3A              | 3B              | 5A              | 5B              | Differences in bond length |               |               |               |               |               |               |               |
|-----------|-----------|-----------------|-----------------|-----------------|-----------------|-----------------|----------------------------|---------------|---------------|---------------|---------------|---------------|---------------|---------------|
|           |           | Length          |                 |                 |                 |                 | 4 - 3A                     | ( $3\sigma$ ) | 4 - 3B        | ( $3\sigma$ ) | 4 - 5A        | ( $3\sigma$ ) | 4 - 5B        | ( $3\sigma$ ) |
| C8a       | C4a       | 1.399(2)        | 1.397(2)        | 1.397(2)        | 1.396(2)        | 1.395(2)        | 0.002                      | 0.008         | 0.002         | 0.008         | 0.003         | 0.008         | 0.004         | 0.008         |
| C4a       | C5        | 1.406(2)        | 1.404(2)        | 1.406(2)        | 1.408(2)        | 1.407(2)        | 0.002                      | 0.008         | 0             | 0.008         | -0.002        | 0.008         | -0.001        | 0.008         |
| C5        | C6        | 1.393(2)        | 1.390(3)        | 1.391(3)        | 1.395(2)        | 1.395(2)        | 0.003                      | 0.011         | 0.002         | 0.011         | -0.002        | 0.008         | -0.002        | 0.008         |
| <b>C6</b> | <b>C7</b> | <b>1.397(2)</b> | <b>1.401(2)</b> | <b>1.401(2)</b> | <b>1.404(2)</b> | <b>1.404(2)</b> | <b>-0.004</b>              | <b>0.008</b>  | <b>-0.004</b> | <b>0.008</b>  | <b>-0.007</b> | <b>0.008</b>  | <b>-0.007</b> | <b>0.008</b>  |
| C7        | C8        | 1.401(2)        | 1.399(2)        | 1.400(2)        | 1.402(2)        | 1.405(2)        | 0.002                      | 0.008         | 0.001         | 0.008         | -0.001        | 0.008         | -0.004        | 0.008         |
| C8        | C8a       | 1.402(2)        | 1.404(3)        | 1.403(3)        | 1.397(2)        | 1.397(2)        | -0.002                     | 0.011         | -0.001        | 0.011         | 0.005         | 0.008         | 0.005         | 0.008         |
| C8        | C8b       | 1.508(2)        | 1.508(2)        | 1.510(3)        | 1.514(2)        | 1.511(2)        | 0                          | 0.008         | -0.002        | 0.011         | -0.006        | 0.008         | -0.003        | 0.008         |
| C5        | C5a       | 1.508(2)        | 1.508(2)        | 1.508(2)        | 1.510(2)        | 1.510(2)        | 0                          | 0.008         | 0             | 0.008         | -0.002        | 0.008         | -0.002        | 0.008         |
| C7        | C7a       | 1.508(2)        | 1.507(3)        | 1.508(3)        | 1.508(2)        | 1.506(2)        | 0.001                      | 0.011         | 0             | 0.011         | 0             | 0.008         | 0.002         | 0.008         |
| <b>C6</b> | <b>O2</b> | <b>1.399(2)</b> | <b>1.403(2)</b> | <b>1.405(2)</b> | <b>1.390(1)</b> | <b>1.391(1)</b> | -0.004                     | 0.008         | -0.006        | 0.008         | <b>0.009</b>  | <b>0.007</b>  | <b>0.008</b>  | <b>0.007</b>  |
| O1        | C2        | 1.453(2)        | 1.451(3)        | 1.453(3)        | 1.450(2)        | 1.453(2)        | 0.002                      | 0.011         | 0             | 0.011         | 0.003         | 0.008         | 0             | 0.008         |
| O1        | C8a       | 1.383(2)        | 1.380(2)        | 1.379(2)        | 1.381(1)        | 1.382(1)        | 0.003                      | 0.008         | 0.004         | 0.008         | 0.002         | 0.007         | 0.001         | 0.007         |
| C2        | C2b       | 1.523(2)        | 1.525(4)        | 1.521(4)        | 1.521(2)        | 1.525(2)        | -0.002                     | 0.022         | 0.002         | 0.013         | 0.002         | 0.008         | -0.002        | 0.008         |
| C2        | C2a       | 1.519(2)        | 1.517(2)        | 1.522(2)        | 1.517(2)        | 1.517(2)        | 0.002                      | 0.008         | -0.003        | 0.008         | 0.002         | 0.008         | 0.002         | 0.008         |

**Table S5.** The bonds length comparison between 4-methoxy-2,3,5,6-tetramethylphenol (4MTP, CCDC MOPHLA) and ethers **4**, **3A-B** and **5A-B**.

| bond      |            | 4PMT         | 4            | 3A           | 3B           | 5A           | 5B           | 4-4PMT        | 3A-4PMT       | 3B-4PMT       | 5A-4PMT       | 5B-4PMT       |
|-----------|------------|--------------|--------------|--------------|--------------|--------------|--------------|---------------|---------------|---------------|---------------|---------------|
| C8a       | C4a        | 1.382        | 1.399        | 1.397        | 1.397        | 1.396        | 1.395        | 0.017         | 0.015         | 0.015         | 0.014         | 0.013         |
| C4A       | C5         | 1.394        | 1.406        | 1.404        | 1.406        | 1.408        | 1.407        | 0.012         | 0.010         | 0.012         | 0.014         | 0.013         |
| C5        | C6         | 1.390        | 1.393        | 1.39         | 1.391        | 1.395        | 1.395        | 0.003         | 0.000         | 0.001         | 0.005         | 0.005         |
| <b>C6</b> | <b>C7</b>  | <b>1.387</b> | <b>1.397</b> | <b>1.401</b> | <b>1.401</b> | <b>1.404</b> | <b>1.404</b> | <b>0.010</b>  | <b>0.014</b>  | <b>0.014</b>  | <b>0.017</b>  | <b>0.017</b>  |
| C7        | C8         | 1.398        | 1.401        | 1.399        | 1.4          | 1.402        | 1.405        | 0.003         | 0.001         | 0.002         | 0.004         | 0.007         |
| <b>C8</b> | <b>C8a</b> | <b>1.387</b> | <b>1.402</b> | <b>1.404</b> | <b>1.403</b> | <b>1.397</b> | <b>1.397</b> | <b>0.015</b>  | <b>0.017</b>  | <b>0.016</b>  | <b>0.010</b>  | <b>0.010</b>  |
| C8        | C8a        | 1.509        | 1.508        | 1.508        | 1.51         | 1.514        | 1.511        | -0.001        | -0.001        | 0.001         | 0.005         | 0.002         |
| C5        | C5a        | 1.504        | 1.508        | 1.508        | 1.508        | 1.51         | 1.51         | 0.004         | 0.004         | 0.004         | 0.006         | 0.006         |
| C7        | C7a        | 1.508        | 1.508        | 1.507        | 1.508        | 1.508        | 1.506        | 0.000         | -0.001        | 0.000         | 0.000         | -0.002        |
| C6        | O2         | 1.409        | 1.399        | 1.403        | 1.405        | 1.39         | 1.391        | -0.010        | -0.006        | -0.004        | -0.019        | -0.018        |
| O1        | C2         | 1.443        | 1.453        | 1.451        | 1.453        | 1.45         | 1.453        | 0.010         | 0.008         | 0.010         | 0.007         | 0.010         |
| <b>O1</b> | <b>C8a</b> | <b>1.409</b> | <b>1.383</b> | <b>1.38</b>  | <b>1.379</b> | <b>1.381</b> | <b>1.382</b> | <b>-0.026</b> | <b>-0.029</b> | <b>-0.030</b> | <b>-0.028</b> | <b>-0.027</b> |

**Tabela S6.** Data for ether **3** from WinNMR.

|                                    |              |              |              |              |              |              |              |              |              |              |              |
|------------------------------------|--------------|--------------|--------------|--------------|--------------|--------------|--------------|--------------|--------------|--------------|--------------|
| Temp.<br>[K]                       | <b>165.0</b> | <b>170.5</b> | <b>172.5</b> | <b>174.0</b> | <b>176.0</b> | <b>177.6</b> | <b>179.2</b> | <b>182.0</b> | <b>184.5</b> | <b>193.0</b> | <b>219.7</b> |
| $\Delta G^\#_{(ab)}$<br>[kcal/mol] | 8.56         | 8.56         | 8.54         | 8.53         | 8.46         | 8.46         | 8.43         | 8.39         | 8.39         | 8.36         | 8.14         |
| 1/T<br>[ $\times 10^{-2}$ ]        | 0.606        | 0.586        | 0.579        | 0.574        | 0.568        | 0.563        | 0.557        | 0.549        | 0.542        | 0.518        | 0.455        |
| <i>kab</i>                         | 15.68        | 37.75        | 55.189       | 70.451       | 116.147      | 144.011      | 195.149      | 315.         | 437.950      | 1360.        | 36800        |
| ln <i>k</i>                        | 2.752        | 3.631        | 4.011        | 4.255        | 4.755        | 4.97         | 5.274        | 5.753        | 6.082        | 7.215        | 10.513       |

Average  $\Delta G^\#_{(ab)} = 8.44 \text{ kcal}\cdot\text{mol}^{-1}$ ; std. dev. =  $0.42 \text{ kcal}\cdot\text{mol}^{-1}$

**Table S7.** Energies [kJ/mol], relative energies [kJ/mol] and calculated NMR isotropic chemical shift values [ppm] of the studied conformations of 3.

| Conformation                |       | a          | b          | c          | d          | e          | f          | g          | h          | i          | j          |
|-----------------------------|-------|------------|------------|------------|------------|------------|------------|------------|------------|------------|------------|
| symbol                      |       |            |            |            |            |            |            |            |            |            |            |
| Relative energy<br>[kJ/mol] |       | 0.00       | 0.00       | 0.00       | 0.00       | 0.00       | 19.86      | 20.09      | 26.25      | 30.74      | 30.74      |
| Energy [kJ/mol]             |       | −2513941.2 | −2513941.2 | −2513941.2 | −2513941.2 | −2513941.2 | −2513921.4 | −2513921.1 | −2513915.0 |            |            |
| Atom                        |       | 8          | 8          | 8          | 8          | 8          | 1          | 9          | 3          | 2513910.54 | 2513910.54 |
| number                      | Exp.  | GIAO       |            |            |            |            |            |            |            |            |            |
| 2                           | 72.6  | 73.65      | 73.64      | 73.65      | 73.65      | 73.65      | 73.53      | 73.53      | 73.95      | 73.49      | 73.49      |
| 2a                          | 26.9  | 25.85      | 25.85      | 25.85      | 25.85      | 25.85      | 25.78      | 25.8       | 25.83      | 25.72      | 25.72      |
| 2b                          | 26.8  | 27.43      | 27.48      | 27.43      | 27.43      | 27.43      | 27.38      | 27.48      | 27.47      | 27.53      | 27.52      |
| 3                           | 32.9  | 30.8       | 30.8       | 30.8       | 30.8       | 30.8       | 30.85      | 30.9       | 30.8       | 30.82      | 30.82      |
| 4                           | 21.1  | 19.66      | 19.66      | 19.66      | 19.67      | 19.67      | 19.7       | 19.67      | 19.83      | 19.62      | 19.62      |
| 4a                          | 117   | 118.48     | 118.48     | 118.48     | 118.48     | 118.48     | 118.19     | 119.15     | 117.25     | 118.86     | 118.86     |
| 5                           | 126.4 | 127.05     | 126.04     | 126.05     | 126.04     | 126.05     | 132.79     | 130.97     | 124.82     | 124.09     | 124.1      |
| 5a                          | 11.9  | 9.52       | 9.52       | 9.52       | 9.52       | 9.57       | 9.75       | 8.51       | 9.15       | 7.74       | 7.74       |
| 6                           | 147.3 | 148.38     | 148.38     | 148.38     | 148.39     | 148.38     | 151.03     | 150.68     | 149.06     | 148.38     | 148.38     |
| 7                           | 128.2 | 129.42     | 129.42     | 129.42     | 129.43     | 129.42     | 129.45     | 131.86     | 130.89     | 133.16     | 133.16     |
| 7a                          | 13.8  | 13.35      | 13.35      | 13.35      | 13.35      | 13.45      | 14.05      | 15.5       | 12.87      | 14.56      | 14.56      |
| 8                           | 122.6 | 124.46     | 124.46     | 124.46     | 124.45     | 124.46     | 124.96     | 123.92     | 125.5      | 124.01     | 124.01     |
| 8b                          | 12.9  | 12.45      | 12.33      | 12.34      | 12.34      | 12.44      | 12.38      | 12.32      | 12.1       | 12.19      | 12.19      |
| 8a                          | 148   | 149.75     | 149.74     | 149.75     | 149.74     | 149.75     | 149.59     | 149.56     | 149.47     | 149.52     | 149.52     |
| 1'                          | 103.7 | 104.95     | 104.94     | 104.95     | 104.95     | 104.95     | 102.11     | 102.49     | 103.53     | 103.76     | 103.75     |
| 2'                          | 31.3  | 30.67      | 30.67      | 30.67      | 30.67      | 30.67      | 29.09      | 29.17      | 31.06      | 24.22      | 24.22      |
| 3'                          | 21.2  | 21.5       | 21.5       | 21.5       | 21.5       | 21.5       | 16.49      | 16.55      | 21.3       | 13.84      | 13.85      |
| 4'                          | 25.2  | 24.11      | 24.2       | 24.1       | 24.11      | 24.2       | 24.52      | 24.56      | 23.88      | 20.24      | 20.24      |

|    |       |       |       |       |       |       |             |       |       |       |       |
|----|-------|-------|-------|-------|-------|-------|-------------|-------|-------|-------|-------|
| 5' | 65.1  | 65.45 | 65.45 | 65.44 | 65.45 | 65.45 | 60.93       | 61    | 65.87 | 56.2  | 56.2  |
|    |       |       |       |       |       |       | Exp. - GIAO |       |       |       |       |
| 2  | 72.6  | -1.05 | -1.04 | -1.05 | -1.05 | -1.05 | -0.93       | -0.93 | -1.35 | -0.89 | -0.89 |
| 2a | 26.9  | 1.05  | 1.05  | 1.05  | 1.05  | 1.05  | 1.12        | 1.1   | 1.07  | 1.18  | 1.18  |
| 2b | 26.8  | -0.63 | -0.68 | -0.63 | -0.63 | -0.63 | -0.58       | -0.68 | -0.67 | -0.73 | -0.72 |
| 3  | 32.9  | 2.1   | 2.1   | 2.1   | 2.1   | 2.1   | 2.05        | 2     | 2.1   | 2.08  | 2.08  |
| 4  | 21.1  | 1.44  | 1.44  | 1.44  | 1.43  | 1.43  | 1.4         | 1.43  | 1.27  | 1.48  | 1.48  |
| 4a | 117   | -1.48 | -1.48 | -1.48 | -1.48 | -1.48 | -1.19       | -2.15 | -0.25 | -1.86 | -1.86 |
| 5  | 126.4 | -0.65 | 0.36  | 0.35  | 0.36  | 0.35  | -6.39       | -4.57 | 1.58  | 2.31  | 2.3   |
| 5a | 11.9  | 2.38  | 2.38  | 2.38  | 2.38  | 2.33  | 2.15        | 3.39  | 2.75  | 4.16  | 4.16  |
| 6  | 147.3 | -1.08 | -1.08 | -1.08 | -1.09 | -1.08 | -3.73       | -3.38 | -1.76 | -1.08 | -1.08 |
| 7  | 128.2 | -1.22 | -1.22 | -1.22 | -1.23 | -1.22 | -1.25       | -3.66 | -2.69 | -4.96 | -4.96 |
| 7a | 13.8  | 0.45  | 0.45  | 0.45  | 0.45  | 0.35  | -0.25       | -1.7  | 0.93  | -0.76 | -0.76 |
| 8  | 122.6 | -1.86 | -1.86 | -1.86 | -1.85 | -1.86 | -2.36       | -1.32 | -2.9  | -1.41 | -1.41 |
| 8b | 12.9  | 0.45  | 0.57  | 0.56  | 0.56  | 0.46  | 0.52        | 0.58  | 0.8   | 0.71  | 0.71  |
| 8a | 148   | -1.75 | -1.74 | -1.75 | -1.74 | -1.75 | -1.59       | -1.56 | -1.47 | -1.52 | -1.52 |
| 1' | 103.7 | -1.25 | -1.24 | -1.25 | -1.25 | -1.25 | 1.59        | 1.21  | 0.17  | -0.06 | -0.05 |
| 2' | 31.3  | 0.63  | 0.63  | 0.63  | 0.63  | 0.63  | 2.21        | 2.13  | 0.24  | 7.08  | 7.08  |
| 3' | 21.2  | -0.3  | -0.3  | -0.3  | -0.3  | -0.3  | 4.71        | 4.65  | -0.1  | 7.36  | 7.35  |
| 4' | 25.2  | 1.09  | 1     | 1.1   | 1.09  | 1     | 0.68        | 0.64  | 1.32  | 4.96  | 4.96  |
| 5' | 65.1  | -0.35 | -0.35 | -0.34 | -0.35 | -0.35 | 4.17        | 4.1   | -0.77 | 8.9   | 8.9   |

Conformation

| symbol                   | k        | l        | m        | n        | o        | p        | q        | r        | s        | t        |
|--------------------------|----------|----------|----------|----------|----------|----------|----------|----------|----------|----------|
| Relative energy [kJ/mol] |          | 41.41    | 41.41    | 41.41    | 41.41    | 41.41    | 41.41    | 41.41    | 41.41    | 41.41    |
| Energy                   | -2513900 | -2513900 | -2513900 | -2513900 | -2513900 | -2513900 | -2513900 | -2513900 | -2513900 | -2513900 |

| [kJ/mol]    |       |        |        |        |        |        |        |        |        |        |        |
|-------------|-------|--------|--------|--------|--------|--------|--------|--------|--------|--------|--------|
| Atom        |       |        |        |        |        |        |        |        |        |        |        |
| number      | Exp.  | GIAO   |        |        |        |        |        |        |        |        |        |
| 2           | 72.6  | 73.66  | 73.66  | 73.66  | 73.66  | 73.66  | 73.66  | 73.66  | 73.66  | 73.77  | 73.66  |
| 2a          | 26.9  | 25.86  | 25.86  | 25.86  | 25.85  | 25.86  | 25.86  | 25.86  | 25.86  | 25.86  | 25.86  |
| 2b          | 26.8  | 27.45  | 27.44  | 27.44  | 27.44  | 27.44  | 27.45  | 27.44  | 27.44  | 27.44  | 27.44  |
| 3           | 32.9  | 30.8   | 30.8   | 30.8   | 30.8   | 30.8   | 30.8   | 30.8   | 30.8   | 30.8   | 30.8   |
| 4           | 21.1  | 19.67  | 19.67  | 19.7   | 19.67  | 19.67  | 19.67  | 19.67  | 19.67  | 19.67  | 19.67  |
| 4a          | 117   | 118.52 | 118.6  | 118.52 | 118.52 | 118.52 | 118.52 | 118.52 | 118.51 | 118.52 | 118.52 |
| 5           | 126.4 | 127.47 | 127.47 | 127.47 | 127.47 | 127.47 | 127.47 | 127.46 | 127.47 | 127.47 | 127.46 |
| 5a          | 11.9  | 9.57   | 9.57   | 9.57   | 9.57   | 9.57   | 9.56   | 9.57   | 9.57   | 9.57   | 9.57   |
| 6           | 147.3 | 148.37 | 148.37 | 148.37 | 148.37 | 148.37 | 148.37 | 148.37 | 148.47 | 148.37 | 148.37 |
| 7           | 128.2 | 129.4  | 129.4  | 129.4  | 129.4  | 129.4  | 129.4  | 129.4  | 129.4  | 129.4  | 129.4  |
| 7a          | 13.8  | 13.01  | 13     | 13     | 13.01  | 13.01  | 13     | 13     | 13.01  | 13     | 13     |
| 8           | 122.6 | 124.43 | 124.43 | 124.43 | 124.44 | 124.43 | 124.43 | 124.43 | 124.43 | 124.43 | 124.43 |
| 8b          | 12.9  | 12.3   | 12.3   | 12.29  | 12.29  | 12.3   | 12.29  | 12.3   | 12.29  | 12.29  | 12.3   |
| 8a          | 148   | 149.76 | 149.76 | 149.76 | 149.76 | 149.76 | 149.76 | 149.76 | 149.75 | 149.76 | 149.76 |
| 1'          | 103.7 | 101.42 | 101.42 | 101.42 | 101.42 | 101.42 | 101.43 | 101.42 | 101.42 | 101.42 | 101.41 |
| 2'          | 31.3  | 28.34  | 28.43  | 28.34  | 28.34  | 28.34  | 28.33  | 28.34  | 28.34  | 28.34  | 28.34  |
| 3'          | 21.2  | 16.35  | 16.35  | 16.35  | 16.45  | 16.35  | 16.35  | 16.35  | 16.35  | 16.35  | 16.35  |
| 4'          | 25.2  | 19.53  | 19.53  | 19.53  | 19.53  | 19.53  | 19.52  | 19.53  | 19.53  | 19.53  | 19.53  |
| 5'          | 65.1  | 62.63  | 62.63  | 62.63  | 62.63  | 62.63  | 62.63  | 62.63  | 62.63  | 62.63  | 62.63  |
| Exp. - GIAO |       |        |        |        |        |        |        |        |        |        |        |
| 2           | 72.6  | -1.06  | -1.06  | -1.06  | -1.06  | -1.06  | -1.06  | -1.06  | -1.06  | -1.17  | -1.06  |
| 2a          | 26.9  | 1.04   | 1.04   | 1.04   | 1.05   | 1.04   | 1.04   | 1.04   | 1.04   | 1.04   | 1.04   |
| 2b          | 26.8  | -0.65  | -0.64  | -0.64  | -0.64  | -0.64  | -0.65  | -0.64  | -0.64  | -0.64  | -0.64  |
| 3           | 32.9  | 2.1    | 2.1    | 2.1    | 2.1    | 2.1    | 2.1    | 2.1    | 2.1    | 2.1    | 2.1    |
| 4           | 21.1  | 1.43   | 1.43   | 1.4    | 1.43   | 1.43   | 1.43   | 1.43   | 1.43   | 1.43   | 1.43   |



|    |       |       |       |       |       |       |       |       |       |       |       |
|----|-------|-------|-------|-------|-------|-------|-------|-------|-------|-------|-------|
| 4a | 117   | -1.52 | -1.6  | -1.52 | -1.52 | -1.52 | -1.52 | -1.52 | -1.51 | -1.52 | -1.52 |
| 5  | 126.4 | -1.07 | -1.07 | -1.07 | -1.07 | -1.07 | -1.07 | -1.06 | -1.07 | -1.07 | -1.06 |
| 5a | 11.9  | 2.33  | 2.33  | 2.33  | 2.33  | 2.33  | 2.34  | 2.33  | 2.33  | 2.33  | 2.33  |
| 6  | 147.3 | -1.07 | -1.07 | -1.07 | -1.07 | -1.07 | -1.07 | -1.07 | -1.17 | -1.07 | -1.07 |
| 7  | 128.2 | -1.2  | -1.2  | -1.2  | -1.2  | -1.2  | -1.2  | -1.2  | -1.2  | -1.2  | -1.2  |
| 7a | 13.8  | 0.79  | 0.8   | 0.8   | 0.79  | 0.79  | 0.8   | 0.8   | 0.79  | 0.8   | 0.8   |
| 8  | 122.6 | -1.83 | -1.83 | -1.83 | -1.84 | -1.83 | -1.83 | -1.83 | -1.83 | -1.83 | -1.83 |
| 8b | 12.9  | 0.6   | 0.6   | 0.61  | 0.61  | 0.6   | 0.61  | 0.6   | 0.61  | 0.61  | 0.6   |
| 8a | 148   | -1.76 | -1.76 | -1.76 | -1.76 | -1.76 | -1.76 | -1.76 | -1.75 | -1.76 | -1.76 |
| 1' | 103.7 | 2.28  | 2.28  | 2.28  | 2.28  | 2.28  | 2.27  | 2.28  | 2.28  | 2.28  | 2.29  |
| 2' | 31.3  | 2.96  | 2.87  | 2.96  | 2.96  | 2.96  | 2.97  | 2.96  | 2.96  | 2.96  | 2.96  |
| 3' | 21.2  | 4.85  | 4.85  | 4.85  | 4.75  | 4.85  | 4.85  | 4.85  | 4.85  | 4.85  | 4.85  |
| 4' | 25.2  | 5.67  | 5.67  | 5.67  | 5.67  | 5.67  | 5.68  | 5.67  | 5.67  | 5.67  | 5.67  |
| 5' | 65.1  | 2.47  | 2.47  | 2.47  | 2.47  | 2.47  | 2.47  | 2.47  | 2.47  | 2.47  | 2.47  |

| Conformation symbol      | u     | v        | w        | x        | y        | z        |          |
|--------------------------|-------|----------|----------|----------|----------|----------|----------|
| Relative energy [kJ/mol] |       | 42.78    | 42.78    | 42.78    | 42.78    | 42.78    | 42.78    |
| Energy [kJ/mol]          |       | -2513899 | -2513899 | -2513899 | -2513899 | -2513899 | -2513899 |
| Atom number              | Exp.  | GIAO     |          |          |          |          |          |
| 2                        | 72.6  | 73.52    | 73.52    | 73.52    | 73.52    | 73.52    | 73.52    |
| 2a                       | 26.9  | 25.75    | 25.75    | 25.75    | 25.75    | 25.75    | 25.75    |
| 2b                       | 26.8  | 27.49    | 27.48    | 27.48    | 27.48    | 27.48    | 27.48    |
| 3                        | 32.9  | 30.78    | 30.77    | 30.77    | 30.77    | 30.77    | 30.77    |
| 4                        | 21.1  | 19.47    | 19.47    | 19.47    | 19.37    | 19.47    | 19.47    |
| 4a                       | 117   | 118.63   | 118.63   | 118.63   | 118.63   | 118.63   | 118.63   |
| 5                        | 126.4 | 123.69   | 123.69   | 123.69   | 123.69   | 123.69   | 123.69   |
| 5a                       | 11.9  | 7.79     | 7.79     | 7.8      | 7.79     | 7.79     | 7.79     |
| 6                        | 147.3 | 148.26   | 148.25   | 148.25   | 148.25   | 148.26   | 148.25   |

|           |       |        |        |        |        |        |        |
|-----------|-------|--------|--------|--------|--------|--------|--------|
| 7         | 128.2 | 133.78 | 133.78 | 133.79 | 133.79 | 133.78 | 133.79 |
| 7a        | 13.8  | 15.1   | 15.11  | 15.09  | 15.1   | 15.11  | 15.11  |
| 8         | 122.6 | 124.15 | 124.15 | 124.14 | 124.15 | 124.15 | 124.15 |
| 8b        | 12.9  | 11.92  | 11.92  | 11.91  | 11.92  | 11.92  | 11.92  |
| 8a        | 148   | 149.39 | 149.39 | 149.39 | 149.39 | 149.39 | 149.39 |
| 1'        | 103.7 | 102.14 | 102.15 | 102.15 | 102.13 | 102.14 | 102.15 |
| 2'        | 31.3  | 28.38  | 28.37  | 28.38  | 28.37  | 28.38  | 28.37  |
| 3'        | 21.2  | 16.33  | 16.33  | 16.43  | 16.33  | 16.35  | 16.33  |
| 4'        | 25.2  | 19.46  | 19.46  | 19.46  | 19.46  | 19.46  | 19.46  |
| 5'        | 65.1  | 62.48  | 62.48  | 62.48  | 62.48  | 62.49  | 62.48  |
| Exp.-GIAO |       |        |        |        |        |        |        |
| 2         | 72.6  | -0.92  | -0.92  | -0.92  | -0.92  | -0.92  | -0.92  |
| 2a        | 26.9  | 1.15   | 1.15   | 1.15   | 1.15   | 1.15   | 1.15   |
| 2b        | 26.8  | -0.69  | -0.68  | -0.68  | -0.68  | -0.68  | -0.68  |
| 3         | 32.9  | 2.12   | 2.13   | 2.13   | 2.13   | 2.13   | 2.13   |
| 4         | 21.1  | 1.63   | 1.63   | 1.63   | 1.73   | 1.63   | 1.63   |
| 4a        | 117   | -1.63  | -1.63  | -1.63  | -1.63  | -1.63  | -1.63  |
| 5         | 126.4 | 2.71   | 2.71   | 2.71   | 2.71   | 2.71   | 2.71   |
| 5a        | 11.9  | 4.11   | 4.11   | 4.1    | 4.11   | 4.11   | 4.11   |
| 6         | 147.3 | -0.96  | -0.95  | -0.95  | -0.95  | -0.96  | -0.95  |
| 7         | 128.2 | -5.58  | -5.58  | -5.59  | -5.59  | -5.58  | -5.59  |
| 7a        | 13.8  | -1.3   | -1.31  | -1.29  | -1.3   | -1.31  | -1.31  |
| 8         | 122.6 | -1.55  | -1.55  | -1.54  | -1.55  | -1.55  | -1.55  |
| 8b        | 12.9  | 0.98   | 0.98   | 0.99   | 0.98   | 0.98   | 0.98   |
| 8a        | 148   | -1.39  | -1.39  | -1.39  | -1.39  | -1.39  | -1.39  |
| 1'        | 103.7 | 1.56   | 1.55   | 1.55   | 1.57   | 1.56   | 1.55   |
| 2'        | 31.3  | 2.92   | 2.93   | 2.92   | 2.93   | 2.92   | 2.93   |
| 3'        | 21.2  | 4.87   | 4.87   | 4.77   | 4.87   | 4.85   | 4.87   |

|    |      |      |      |      |      |      |      |
|----|------|------|------|------|------|------|------|
| 4' | 25.2 | 5.74 | 5.74 | 5.74 | 5.74 | 5.74 | 5.74 |
| 5' | 65.1 | 2.62 | 2.62 | 2.62 | 2.62 | 2.61 | 2.62 |
